# Supplementary material for: Genome-Wide Definition of Promoter and Enhancer Usage during Neural Induction of Human Embryonic Stem Cells
Source: PLOS journal article supplement (doi:10.1371/journal.pone.0126590), 2015-05-15
Supplement: S1 (10.1371/journal.pone.0126590.s001) [file journal.pone.0126590.s001]

**A**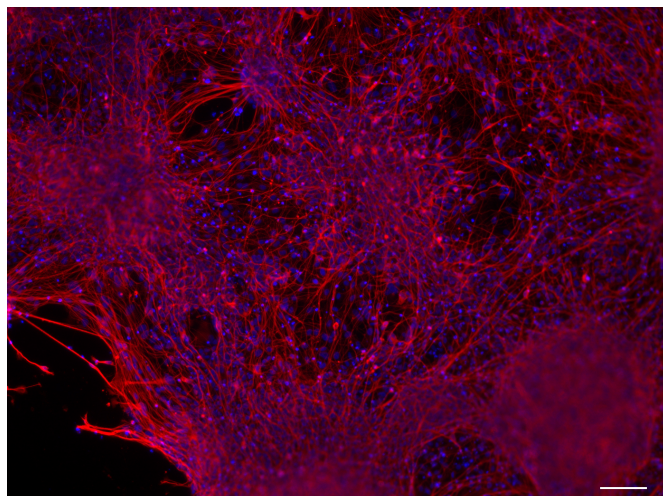DAPI  
MAP2**B**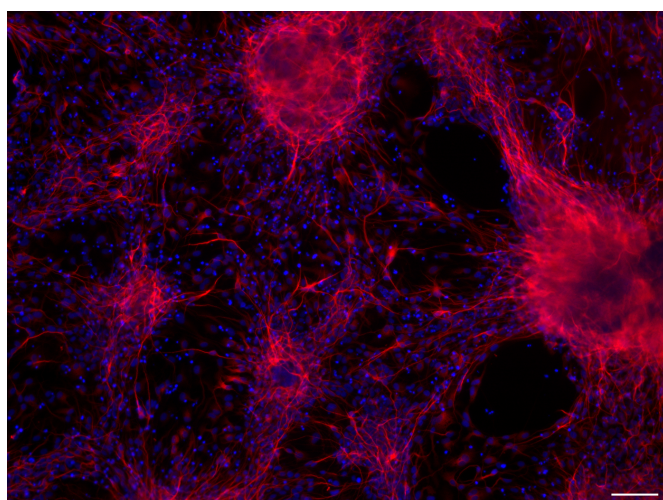DAPI  
TUBB3**C**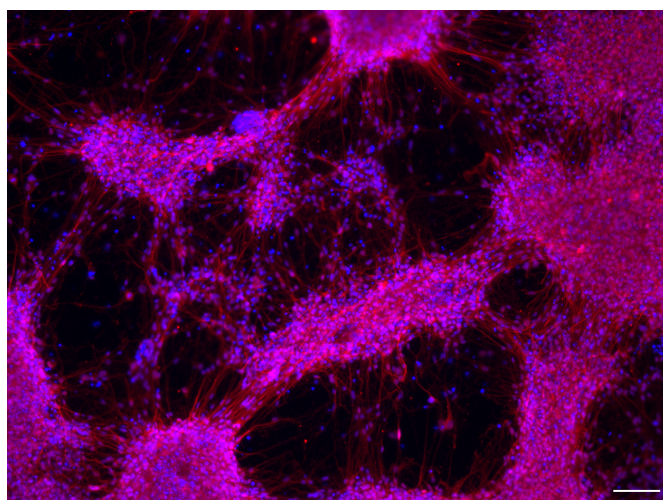DAPI  
GAD65/67

**Figure S1. Terminally differentiated neurons derived from N ESCs.** In the absence of specific growth factors, N ESCs give rise to mature neurons positive for neuronal markers such as MAP2 (A), TUBB3 (B), and for GAD65-67 (C), a GABAergic-specific protein. Bar scale 100  $\mu$ m.
